# Supplementary material for: Nano-Encapsulated Antioxidant: Retinoic Acid as a Natural Mucosal Adjuvant for Intranasal Immunization against Chronic Experimental Toxoplasmosis
Source: MDPI journal article supplement (doi:10.3390/tropicalmed8020106), 2023-02-07
Supplement: s1 [file s1]

**Table S1: Mean number of *T. gondii* tachyzoites ( $\times 10^4$ ) per well in culture supernatant of Vero cells among all studied groups:**

| Tachyzoite count | Group I<br>(n = 3) | Group II<br>(n = 3) | Group III<br>(n = 3) | Group IV<br>(n = 3)                         | Group V<br>(n = 3) | F <sub>p</sub> |
|------------------|--------------------|---------------------|----------------------|---------------------------------------------|--------------------|----------------|
| Mean             | 46.67              | 33.33               | 25.17                | 25.67                                       | 16.33              | <0.001*        |
| $\pm$ SD.        | 3.06               | 1.15                | 1.26                 | 0.58                                        | 1.53               |                |
| % reduction      |                    | 28.6                | 46.1                 | 45.0                                        | 65.0               |                |
| $p_1$            |                    | <0.001*             | <0.001*              | <0.001*                                     | <0.001*            |                |
| $p_2$            |                    |                     | 0.001*               | 0.002*                                      | <0.001*            |                |
| Sig. bet. grps.  |                    |                     |                      | $p_3 = 0.996, p_4 = 0.001^*, p_5 < 0.001^*$ |                    |                |

SD: Standard deviation, F: F for ANOVA test, Pairwise comparison bet each 2 groups was done using Post Hoc Test (Tukey)

$p$ :  $p$  value for comparing between the different studied groups

$p_1$ ;  $p$  value for comparing between **Group I** and each other group

$p_2$ ;  $p$  value for comparing between **Group II** and each other group

$p_3$ ;  $p$  value for comparing between **Group III** and **Group IV**

$p_4$ ;  $p$  value for comparing between **Group III** and **Group V**

$p_5$ ;  $p$  value for comparing between **Group IV** and **Group V**

\*: Statistically significant at  $p \leq 0.05$

**Group I:** Control

**Group II:** RA–SLNs, **Group III:** TLA

**Group IV:** TLA/ plain SLNs,

**Group V:** TLA/ RA–SLNs,
